# Supplementary material
Source: HighWire-hosted journal article supplement (https://bmjopenquality.bmj.com/highwire/filestream/136238/field_highwire_adjunct_files/0/ds4133.docx)
Supplement: ds4133.docx [file ds4133.docx]

|  | Name | Hosp # | Date | Time | Cons | EWS | DVT | Abx | Plan | D/c | Sign | Blp |
| --- | --- | --- | --- | --- | --- | --- | --- | --- | --- | --- | --- | --- |
| Weekday | 100 | 100 | 100 | 97 | 100 | 100 | 95 | 100 | 97 | 97 | 82 | 97 |
| w/end | 100 | 100 | 100 | 100 | 100 | 100 | 100 | 100 | 100 | 90 | 81 | 95 |
| Average | **100** | **100** | **100** | **98** | **100** | **100** | **97** | **100** | **98** | **95** | **82** | **97** |
| **Percentage compliance for each criterion: 2nd loop (April 2014)** | | | | | | | | | | | | |

Graph showing percentage compliance for each criterion in loop 2.

Graph showing percentage of criteria met per entry in loop 2.

|  | Name | Hosp # | Date | Time | Cons | EWS | DVT | Abx | Plan | D/c | Sign | Blp |
| --- | --- | --- | --- | --- | --- | --- | --- | --- | --- | --- | --- | --- |
| Weekday | **100** | **100** | **100** | **100** | **100** | **98** | **91** | **89** | **100** | **75** | **100** | **100** |
| w/end | **100** | **100** | **100** | **100** | **100** | **94** | **88** | **88** | **100** | **63** | **100** | **100** |
| Average | **100** | **100** | **100** | **100** | **100** | **96** | **100** | **89** | **100** | **69** | **100** | **100** |
| **Percentage compliance for each criterion: 3rd loop (August 2014)** | | | | | | | | | | | | |

Graph showing percentage compliance for each criterion in loop 3.

Graph showing percentage of criteria met per entry in loop 3.
